# Supplementary material
Source: ML conference proceedings conference paper supplement (https://openaccess.thecvf.com/content/ICCV2025/html/Yuan_Learning_Normal_Flow_ICCV_2025_paper.html)
Supplement: Supplementary file 1 [file Yuan_Learning_Normal_Flow_ICCV_2025_supplemental.pdf]

# Learning Normal Flow Directly From Events

## Supplementary Material

### 8. List of Flow Prediction Videos

We provide flow prediction videos for each evaluated dataset—MVSEC, EVIMO2, and DSEC. These visualizations showcase predictions from models trained on each of the three datasets. Figure 8 shows some screenshots of the video. The videos are in [this link](#). The enumeration of videos are as followed:

- DSEC\_eval\_interlaken\_00\_a.mov
- DSEC\_eval\_interlaken\_00\_b.mov
- DSEC\_eval\_interlaken\_01\_a.mov
- DSEC\_eval\_thun\_01\_a.mov
- DSEC\_eval\_thun\_01\_b.mov
- DSEC\_eval\_zurich\_city\_13\_a.mov
- DSEC\_eval\_zurich\_city\_13\_b.mov
- DSEC\_eval\_zurich\_city\_13\_c.mov
- DSEC\_eval\_zurich\_city\_14\_a.mov
- DSEC\_eval\_zurich\_city\_14\_b.mov
- DSEC\_eval\_zurich\_city\_14\_c.mov
- DSEC\_eval\_zurich\_city\_15\_a.mov
- EVIMO\_eval\_scene13\_dyn\_test\_00\_000000.mov
- EVIMO\_eval\_scene13\_dyn\_test\_05\_000000.mov
- EVIMO\_eval\_scene14\_dyn\_test\_03\_000000.mov
- EVIMO\_eval\_scene14\_dyn\_test\_04\_000000.mov
- EVIMO\_eval\_scene14\_dyn\_test\_05\_000000.mov
- EVIMO\_eval\_scene15\_dyn\_test\_01\_000000.mov
- EVIMO\_eval\_scene15\_dyn\_test\_02\_000000.mov
- EVIMO\_eval\_scene15\_dyn\_test\_05\_000000.mov
- EVIMO\_sfm\_scene\_03\_00\_000000.mov
- EVIMO\_sfm\_scene\_03\_01\_000000.mov
- EVIMO\_sfm\_scene\_03\_02\_000001.mov
- EVIMO\_sfm\_scene\_03\_02\_000002.mov
- EVIMO\_sfm\_scene\_03\_02\_000003.mov
- EVIMO\_sfm\_scene\_03\_03\_000000.mov
- EVIMO\_sfm\_scene\_03\_03\_000001.mov
- EVIMO\_sfm\_scene\_03\_03\_000002.mov
- EVIMO\_sfm\_scene\_03\_04\_000000.mov
- MVSEC\_eval\_indoor\_flying1.mov
- MVSEC\_eval\_outdoor\_day1.mov

In addition, we provide qualitative evaluation on FPV and VECtor, which ground-truth optical flow is not available. The predictions are generated by the model trained on M+D+E to demonstrate the usability of the our estimator. Figure 10 shows some screenshots and the following videos are uploaded:

- VECtor\_sofa\_normal.mov
- VECtor\_sofa\_fast.mov
- VECtor\_mountain\_normal.mov
- VECtor\_mountain\_fast.mov

- FPV\_outdoor\_45\_2\_davis.mov
- FPV\_outdoor\_forward\_6\_davis.mov
- FPV\_indoor\_45\_16\_davis.mov
- FPV\_indoor\_forward\_11\_davis.mov

### 9. Dataset Preprocessing

In this section, we detail how to preprocess the data to obtain undistorted normalized per-event optical flow on MVSEC, EVIMO2, and DSEC.

**MVSEC & EVIMO2** both provide frame-based forward optical flows in the distorted camera coordinates. We first interpolate the flow in the time domain. If an event  $(t, x, y)$  lies between  $t_0$  and  $t_1$ , the optical flow at this event is computed as:

$$\mathbf{u}(t, x, y) = \frac{t - t_0}{t_1 - t_0} \text{flow}(t_1, x, y) + \frac{t_1 - t}{t_1 - t_0} \text{flow}(t_0, x, y)$$

After this, we convert the per-event distorted flow in the raw pixel coordinates into undistorted flow in the normalized pixel coordinates using `cv2.undistortPoints`.

```
start = cv2.undistortPoints(x, y, K, D)
end = cv2.undistortPoints(x +  $\mathbf{u}_x$ , y +  $\mathbf{u}_y$ , K, D)
out = (end - start) / (t1 - t0)
```

This will transform the flow into undistorted normalized camera coordinates, with unit normalized pixel per second. **DSEC**, different from the previous two datasets, provides frame-based forward optical flow and backward optical flow, which can be used to obtain more accurate per-event optical flow. Specifically, we let

$$\text{flow}(t_1, x, y) = \frac{1}{2} ( \text{flow\_forward}(t_1, x, y) - \text{flow\_backward}(t_1, x, y) )$$

The following procedures are the same as the previous two datasets.

### 10. Implementation Details of Our Model

We transform the event pixels and flows into undistorted, normalized camera coordinates as explained in Appendix 9. The resulting flows are then scaled such that their unit is in pixels per second. After this scaling, the flow norms fall within a range of 0 to 3.

During training, we randomly sample an event, using a uniform distribution over the logarithm of the flow norm,

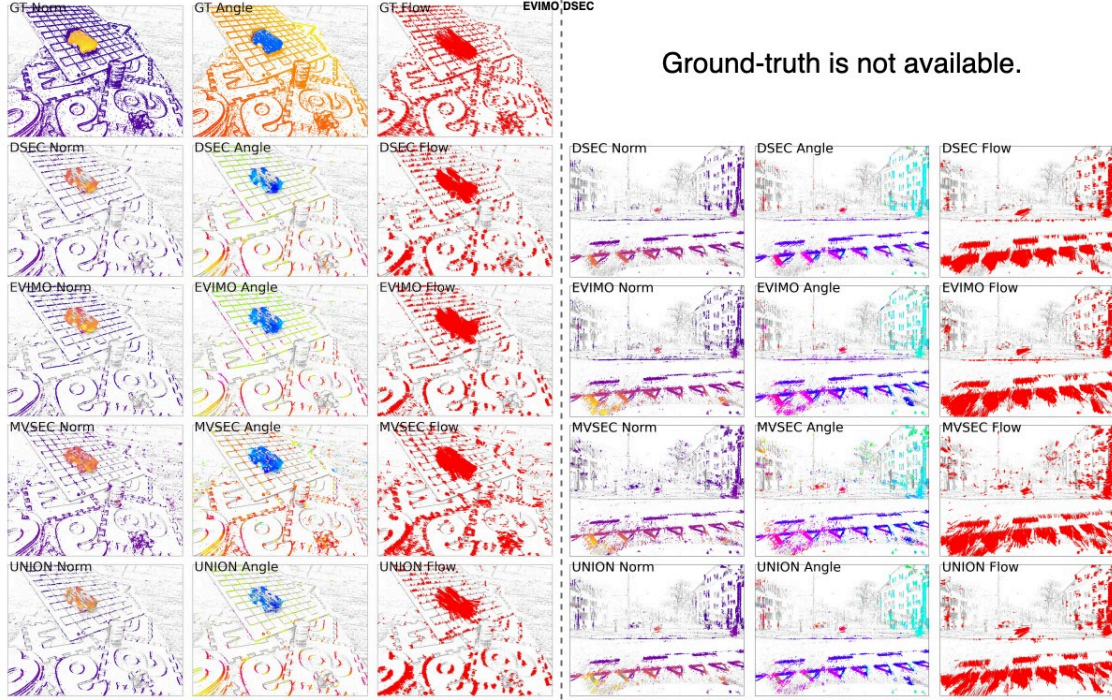

Figure 6. Screenshot of the flow prediction videos. Each row displays the norm, angle, and flow fields of both ground-truth and predicted flows. The first row visualizes the ground-truth optical flow, while subsequent rows show model predictions trained on each dataset. To illustrate the flow field, we sample 5,000 flow points for visualization. If a pixel is gray, it means the flow prediction has a high uncertainty.

|                       | 13_00   |        | 13_05   |        | 14_03   |        | 14_04   |        | 14_05   |        | 15_01   |        | 15_02   |        | 15_05  |        | Average |        |
|-----------------------|---------|--------|---------|--------|---------|--------|---------|--------|---------|--------|---------|--------|---------|--------|--------|--------|---------|--------|
|                       | PEE     | %Pos   | PEE    | %Pos   | PEE     | %Pos   |
| Norm + Direction Loss | 0.972   | 90.0%  | 0.912   | 98.1%  | 0.749   | 98.9%  | 0.762   | 96.9%  | 1.150   | 97.3%  | 0.559   | 96.9%  | 0.610   | 94.5%  | 1.274  | 91.5%  | 0.87    | 95.5%  |
| Ours                  | 0.497   | 96.7%  | 0.399   | 99.2%  | 0.478   | 99.2%  | 0.515   | 98.8%  | 0.584   | 98.6%  | 0.286   | 98.1%  | 0.274   | 96.8%  | 0.354  | 95.5%  | 0.42    | 97.9%  |
| Difference            | ↓ 0.475 | ↑ 6.7% | ↓ 0.513 | ↑ 1.1% | ↓ 0.271 | ↑ 0.3% | ↓ 0.247 | ↑ 1.9% | ↓ 0.566 | ↑ 1.3% | ↓ 0.273 | ↑ 1.2% | ↓ 0.336 | ↑ 2.3% | ↓ 0.92 | ↑ 4.0% | ↓ 0.45  | ↑ 2.4% |

Table 5. Comparison between the estimator trained with our motion field loss function and the one trained with the standard norm-plus-direction loss function. Using our motion field function significantly improves the model’s performance.

within the range of 0.01 to 3. We then slice the event stream around the sampled event to create the training samples. We apply the data augmentation techniques described in Section 3.4. The pixel radius parameters ( $\delta x$ ,  $\delta y$  in Eqn. (3)) are set to 0.02, which correspond to 4.5, 10.4, and 11.1 pixels for the MVSEC, EVIMO2, and DSEC datasets, respectively, measured in terms of raw pixels. The time radius ( $\delta t$  in Eqn. (3)) is 20 ms. The parameter  $\epsilon$  in Eqn. (5) is set to 0.1. The dimension of the local event encoding is 384. We remove the predictions with circular standard deviation larger than 0.15 (Section 3.5). If the events size within 20 ms is larger than 80,000, we randomly sample 80,000 events from the 20 ms interval. Our model is trained end-to-end in one stage, where the VecKM encoding does not require training. The training converges in 24/24/48/64 hours for M/E/D/M+D+E datasets, using the Adam optimizer with a 1e-3 learning rate.

## 11. Ablation Studies

We use the EVIMO2-imo dataset for our ablation studies because it presents challenging scenarios with independently moving objects. The models are trained on EVIMO2-imo training set to better capture the impact of the ablated factors.

### 11.1. Effect of Motion Field Loss

We show that our estimator benefits from being trained on the novel motion field loss by comparing to an optical flow loss. While variations on average end-point error (AEE) are typically used for supervised training of optical flow estimators, our method, which is designed to estimate normal flow, does not converge when trained with such losses. Thus, we designed the following norm + direction loss to train our estimator to estimate optical flow, defined as follows:

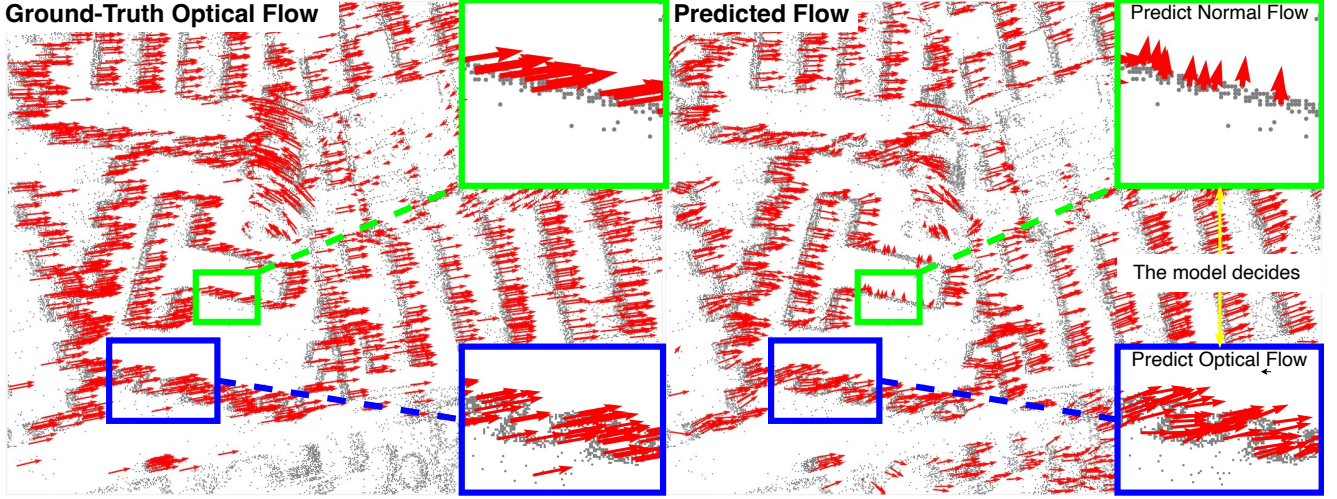

Figure 7. The model can choose between estimating the full optical flow or normal flow depending on the texture of the local region. If the local texture is rich enough (e.g. a corner), the model will estimate full optical flow. If the local texture only contains strong edges, the model will estimate normal flow.

$$\mathcal{L}_1 = \log \left( \frac{\epsilon + \|\mathbf{u}\|}{\epsilon + \|\hat{\mathbf{u}}\|} \right)^2$$

$$\mathcal{L}_2 = - \frac{\mathbf{u} \cdot \hat{\mathbf{u}}}{\|\mathbf{u}\| \cdot \|\hat{\mathbf{u}}\|}$$

$$\mathcal{L} = \mathcal{L}_1 + \mathcal{L}_2$$

Where  $\hat{\mathbf{u}}$  is the output of our method when being trained with this optical flow loss.

As shown in Table 5, our motion field loss function significantly enhances the estimator’s performance in terms of PEE and %Pos. The reason is as followed: When optical flow is unambiguous, predicting optical flow minimizes both objectives. However, when optical flow is ambiguous (e.g. the local events correspond to an edge), our normal flow objective guarantees that predicting normal flow will minimize the loss, while optical flow objective does not.

In addition, we analyze the behavior of our estimator qualitatively in Figure 7. After the model is trained using our motion field loss function, the model can choose between estimating full optical flow or normal flow depending on the texture of the local regions. This further justifies the effect of our motion field loss function.

## 11.2. Effect of Uncertainty Quantification

Figure 9 (Left) provides a comprehensive analysis of the estimator’s performance, showing prediction errors alongside the percentage of confident predictions across various ensemble sizes and uncertainty thresholds. The positive correlation observed between prediction errors and uncertainty scores underscores the effectiveness of the uncertainty quantification. Our results indicate that an un-

certainty threshold between 0.3 and 0.6 achieves an optimal balance between valid prediction rates and accuracy. Additionally, the table reveals that 3 to 4 ensemble predictions are sufficient for consistent uncertainty estimation, though larger ensembles generally yield improved performance. For scenarios where runtime is not a constraint, employing larger ensembles can enhance prediction accuracy.

We also evaluate the egomotion estimation error when setting different uncertainty threshold, shown at Figure 9 (Right). We found an uncertainty threshold of 0.15 yields the best performance. When the threshold is too low, the number of events may be too few to yield good estimation.

## 11.3. Runtime and Memory Usage

Table 7 presents the computational cost of our estimator. Unlike frame-based methods, the runtime of our point-based estimator varies with event density. When event density is high, it may run slower than frame-based methods. However, the computation remains generally feasible even on entry-level GPUs.

## 12. Per-Scene Normal Flow Evaluation on EVIMO2

We present the per-scene normal flow evaluation on EVIMO2-imO, as shown in Table 8.

## 13. Per-Scene Normal Flow Evaluation on DSEC

We present the per-scene normal flow evaluation on DSEC training set holdout, as shown in Table 6. For the model trained on DSEC, it is only trained on



zurich\_city\_02\_c, with a duration of 80 seconds. Our model performs well on day scenes, while its performance degrades when applied to night scenes. As shown in Figure 8, the performance degradation is mainly because many events are continuously triggered by the flickering light. At the same time, our uncertainty quantification module can assign high uncertainty scores to those events.

#### **14. Per-Scene Egomotion Evaluation on EVIMO2**

We present the per-scene egomotion evaluation on EVIMO2, as shown in Figure 11.

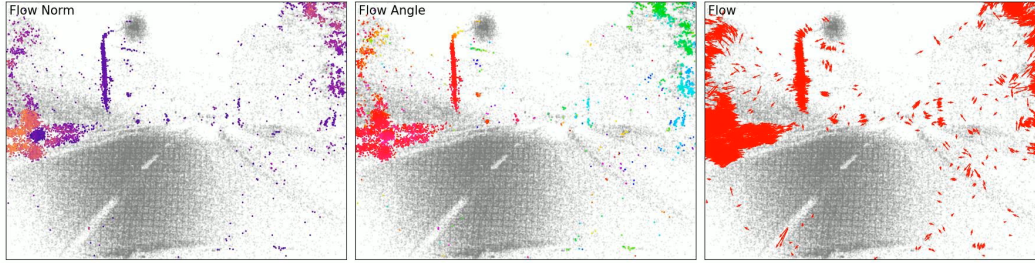

Figure 8. Flow prediction on a night scene zurich\_city\_02\_e. The flickering light causes many events to be triggered continuously, which degrades the performance of our model.

| Day Scenes   |                  |       |                  |       |                  |       |                  |       |
|--------------|------------------|-------|------------------|-------|------------------|-------|------------------|-------|
| training set | zurich_city_01_a |       | zurich_city_02_a |       | zurich_city_02_d |       | zurich_city_05_a |       |
|              | PEE              | %Pos  | PEE              | %Pos  | PEE              | %Pos  | PEE              | %Pos  |
| MVSEC        | 1.377            | 82.5% | 1.162            | 99.6% | 1.316            | 93.3% | 2.176            | 96.3% |
| EVIMO        | 1.008            | 86.6% | 0.977            | 99.8% | 0.749            | 95.1% | 1.281            | 96.0% |
| DSEC         | 0.873            | 87.9% | 0.900            | 99.8% | 0.619            | 95.5% | 1.187            | 95.4% |

  

| Day Scenes   |                  |       |                  |       |                  |       |                  |       |
|--------------|------------------|-------|------------------|-------|------------------|-------|------------------|-------|
| training set | zurich_city_05_b |       | zurich_city_06_a |       | zurich_city_07_a |       | zurich_city_08_a |       |
|              | PEE              | %Pos  | PEE              | %Pos  | PEE              | %Pos  | PEE              | %Pos  |
| MVSEC        | 3.451            | 73.8% | 1.134            | 84.6% | 1.528            | 82.6% | 0.904            | 99.5% |
| EVIMO        | 1.457            | 81.2% | 1.236            | 82.1% | 0.978            | 85.5% | 0.912            | 99.8% |
| DSEC         | 1.485            | 80.5% | 1.493            | 81.3% | 0.972            | 85.9% | 0.820            | 99.8% |

  

| Night Scenes |                  |       |                  |       |                  |       |                  |       |
|--------------|------------------|-------|------------------|-------|------------------|-------|------------------|-------|
| training set | zurich_city_02_e |       | zurich_city_03_a |       | zurich_city_10_a |       | zurich_city_10_b |       |
|              | PEE              | %Pos  | PEE              | %Pos  | PEE              | %Pos  | PEE              | %Pos  |
| MVSEC        | 2.952            | 74.1% | 2.390            | 74.2% | 2.088            | 96.8% | 1.149            | 99.0% |
| EVIMO        | 2.141            | 73.1% | 1.060            | 63.2% | 2.145            | 89.4% | 1.047            | 98.4% |
| DSEC         | 1.972            | 74.2% | 0.862            | 65.3% | 1.710            | 93.3% | 0.885            | 98.4% |

Table 6. Per-scene normal flow evaluation on DSEC training set hold out.

| % Pos           | num_ensemble=2 | num_ensemble=4 | num_ensemble=6 | num_ensemble=10 |
|-----------------|----------------|----------------|----------------|-----------------|
| conf_thres=0.1  | 97.2%          | 97.7%          | 98.4%          | 98.2%           |
| conf_thres=0.2  | 96.9%          | 98.0%          | 98.3%          | 98.4%           |
| conf_thres=0.3  | 96.5%          | 97.7%          | 98.0%          | 98.1%           |
| conf_thres=0.4  | 96.2%          | 97.4%          | 97.7%          | 97.9%           |
| conf_thres=0.5  | 95.9%          | 97.2%          | 97.5%          | 97.7%           |
| conf_thres=0.6  | 95.7%          | 96.9%          | 97.3%          | 97.5%           |
| conf_thres=0.7  | 95.5%          | 96.7%          | 97.1%          | 97.2%           |
| conf_thres=nfty | 92.3%          | 92.6%          | 92.8%          | 92.8%           |

  

| PEE             | num_ensemble=2 | num_ensemble=4 | num_ensemble=6 | num_ensemble=10 |
|-----------------|----------------|----------------|----------------|-----------------|
| conf_thres=0.1  | 0.467          | 0.529          | 0.580          | 0.686           |
| conf_thres=0.2  | 0.461          | 0.442          | 0.436          | 0.436           |
| conf_thres=0.3  | 0.454          | 0.436          | 0.423          | 0.423           |
| conf_thres=0.4  | 0.454          | 0.436          | 0.423          | 0.423           |
| conf_thres=0.5  | 0.454          | 0.436          | 0.423          | 0.423           |
| conf_thres=0.6  | 0.454          | 0.436          | 0.423          | 0.429           |
| conf_thres=0.7  | 0.454          | 0.436          | 0.423          | 0.423           |
| conf_thres=nfty | 0.442          | 0.423          | 0.411          | 0.411           |

  

| Valid Pct.      | num_ensemble=2 | num_ensemble=4 | num_ensemble=6 | num_ensemble=10 |
|-----------------|----------------|----------------|----------------|-----------------|
| conf_thres=0.1  | 45.0%          | 17.4%          | 4.3%           | 1.6%            |
| conf_thres=0.2  | 66.8%          | 53.3%          | 49.6%          | 47.9%           |
| conf_thres=0.3  | 74.9%          | 66.6%          | 65.0%          | 63.3%           |
| conf_thres=0.4  | 78.8%          | 72.2%          | 70.6%          | 68.8%           |
| conf_thres=0.5  | 81.1%          | 75.1%          | 73.4%          | 71.5%           |
| conf_thres=0.6  | 82.7%          | 77.0%          | 75.3%          | 73.6%           |
| conf_thres=0.7  | 83.9%          | 78.5%          | 76.9%          | 76.8%           |
| conf_thres=nfty | 100%           | 100%           | 100%           | 100%            |

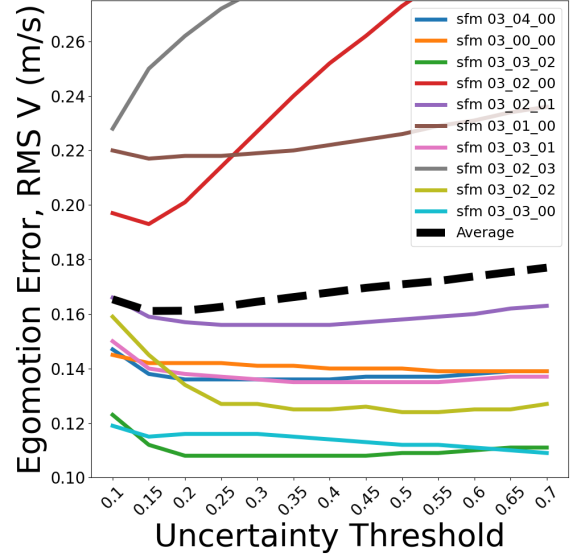

Figure 9. Effectiveness of uncertainty quantification. **Left:** The flow prediction errors are positively correlated with the uncertainty scores. **Right:** The egomotion estimation error is minimized by choosing a suitable threshold. Both findings highlight the effectiveness of the UQ.

|                  | Inference Time (5 ensembles) | Max GPU Memory Allocation |
|------------------|------------------------------|---------------------------|
| num_events = 10k | 0.111 s                      | 0.70 GB                   |
| num_events = 20k | 0.287 s                      | 1.36 GB                   |
| num_events = 40k | 0.910 s                      | 2.71 GB                   |
| num_events = 80k | 3.138 s                      | 5.39 GB                   |

  

| Runtime to process 1 second of events.<br>Tested on RTX3090 | MVSEC<br>outdoor_day_1 | EVIMO<br>imo-13-00 | EVIMO<br>sfm-03-00 | DSEC<br>thun_01_a | DSEC<br>interlaken_00_a |
|-------------------------------------------------------------|------------------------|--------------------|--------------------|-------------------|-------------------------|
| median event density (events / 20 ms)                       | 6900                   | 35500              | 77000              | 101900            | 146400                  |
| Multi-CM (not parallelizable)                               |                        |                    | >30 minutes        |                   |                         |
| E-RAFT                                                      | 7.5 s                  | 40 s               | 40 s               | 40 s              | 40 s                    |
| TCM                                                         | 6.8 s                  | 35 s               | 35 s               | 35 s              | 35 s                    |
| Ours (5 ensembles, max 80k events)                          | 5.9 s                  | 30 s               | 80 s               | 150 s             | 150 s                   |

|                         | #events every 20 ms – quantile |           |          |           |        |
|-------------------------|--------------------------------|-----------|----------|-----------|--------|
|                         | min                            | 25%       | 50%      | 75%       | max    |
| MVSEC – indoor_flying1  | 85                             | 2396.25   | 3720.0   | 5376.0    | 16177  |
| MVSEC – indoor_flying2  | 78                             | 3157.0    | 5297.5   | 7987.5    | 23890  |
| MVSEC – indoor_flying3  | 78                             | 2746.0    | 4850.0   | 6845.0    | 17476  |
| MVSEC – outdoor_day1    | 58                             | 4412.0    | 6903.0   | 10646.75  | 96327  |
| EVIMO – IMO_13_00       | 7954                           | 23564.5   | 35535.0  | 46824.5   | 68946  |
| EVIMO – IMO_13_05       | 10806                          | 55951.0   | 78963.0  | 87891.0   | 120730 |
| EVIMO – SFM_03_00       | 2962                           | 15766.0   | 76979.0  | 88460.5   | 105177 |
| EVIMO – SFM_03_01       | 15315                          | 41049.0   | 80223.0  | 94096.0   | 118441 |
| DSEC – interlaken_00_a  | 123449                         | 133520.0  | 146397.0 | 157920.0  | 165356 |
| DSEC – interlaken_00_b  | 183286                         | 187122.75 | 189133.5 | 196445.75 | 209048 |
| DSEC – thun_01_a        | 66476                          | 83569.25  | 101858.5 | 117016.75 | 121001 |
| DSEC – zurich_city_12_a | 116746                         | 138822.0  | 167154.0 | 196738.5  | 228827 |

Table 7. Runtime and memory cost of our estimator. **Upper Left:** runtime and memory cost when processing events of different densities. **Lower Left:** runtime comparison among existing methods. Multi-CM [46] relies on contrast maximization to estimate optical flow, which significantly increases its runtime when event density is high. In contrast, E-RAFT [21] and TCM [35] are frame-based methods, making their runtime largely independent of event density. The runtime of our point-based estimator, however, varies with event density. While it may run slower than frame-based methods at high event densities, it remains generally feasible even on entry-level GPUs. **Right:** Density statistics of scenes from different datasets.

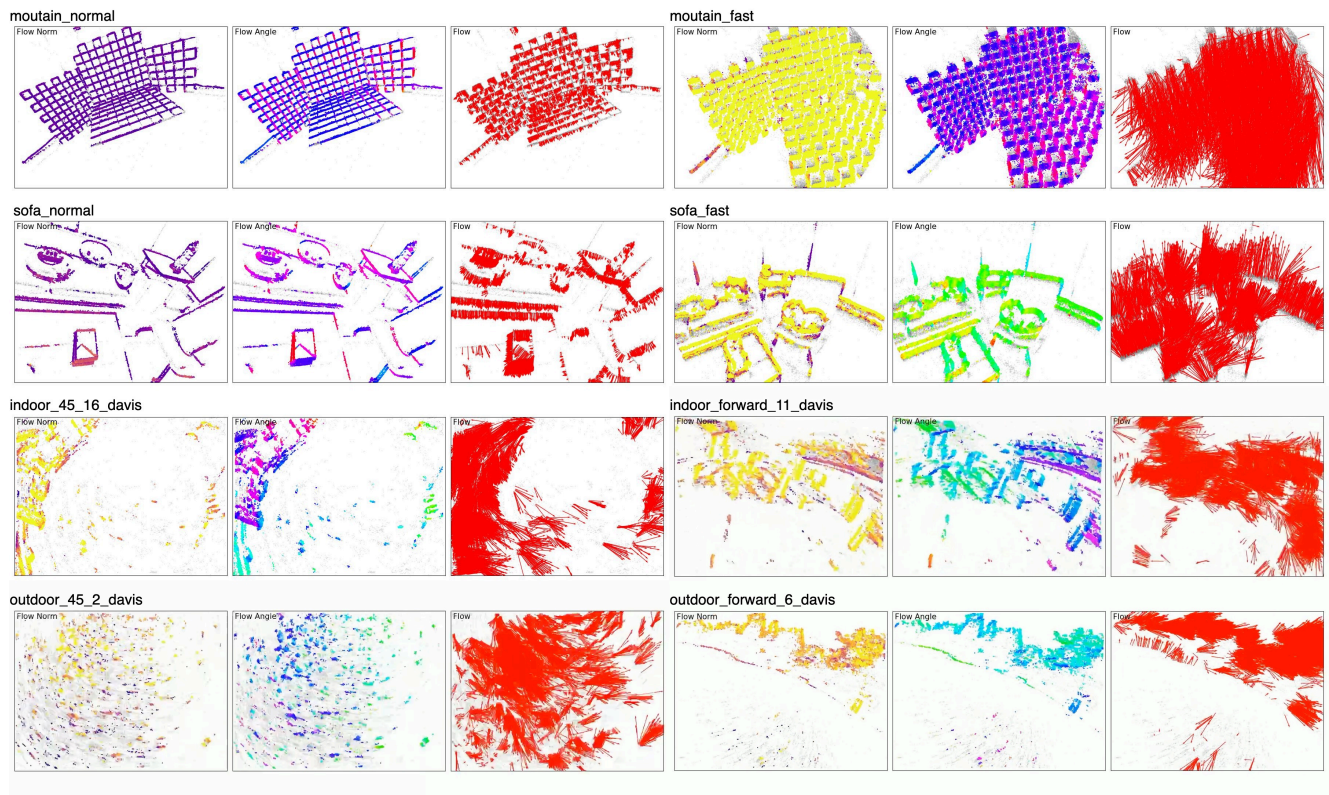

Figure 10. Qualitative evaluation on FPV and VECtor. The predictions are generated using a model trained on M+D+E, demonstrating the estimator’s generalizability across diverse datasets. VECtor in general has more confident predictions than FPV since VECtor uses a higher resolution camera and produces denser events.

|          |     |   | Training Set | Scene_13.00  |              | Scene_13.05  |              | Scene_14.03  |              | Scene_14.04  |              |
|----------|-----|---|--------------|--------------|--------------|--------------|--------------|--------------|--------------|--------------|--------------|
| Input    |     |   |              | PEE ↓        | % Pos ↑      |
| MultiCM  | MB  | F | -            | 1.509        | 53.2%        | 4.315        | 75.7%        | 1.611        | 79.2%        | 1.800        | 73.2%        |
| PCA      | MB  | P | -            | 1.573        | 88.2%        | 2.035        | 87.5%        | 1.580        | 91.9%        | 1.784        | 90.3%        |
| E-RAFT   | SL  | F | M            | 1.370        | 71.9%        | 2.406        | 90.6%        | 1.356        | 69.5%        | 1.458        | 64.6%        |
|          |     |   | D            | 0.843        | 88.9%        | 1.185        | 97.5%        | 0.517        | 88.1%        | 0.538        | 85.9%        |
| TCM      | SSL | F | M            | 0.823        | 85.6%        | 3.201        | 95.3%        | 1.111        | 86.3%        | 1.532        | 86.0%        |
|          |     |   | D            | 0.774        | 87.3%        | 2.541        | 95.1%        | 0.872        | 87.8%        | 1.090        | 86.5%        |
| PointNet | SL  | P | E            | 1.047        | 88.1%        | 0.924        | 97.7%        | 0.848        | 98.3%        | 0.892        | 96.2%        |
| Ours     | SL  | P | M            | 0.713        | 95.6%        | 0.269        | 99.3%        | 0.676        | 98.8%        | 0.651        | 98.1%        |
|          |     |   | D            | 0.590        | 96.6%        | <b>0.230</b> | <b>99.8%</b> | 0.575        | <b>99.8%</b> | 0.625        | <b>99.5%</b> |
|          |     |   | E            | 0.497        | <b>96.7%</b> | 0.399        | 99.2%        | <b>0.478</b> | 99.2%        | 0.515        | 98.8%        |
|          |     |   | M+D+E        | <b>0.465</b> | 96.2%        | 0.308        | 99.2%        | 0.544        | 99.3%        | <b>0.467</b> | 98.8%        |

  

|          |     |   | Training Set | scene_14.05  |              | scene_15.01  |              | scene_15.02  |              | scene_15.05  |              |
|----------|-----|---|--------------|--------------|--------------|--------------|--------------|--------------|--------------|--------------|--------------|
| Input    |     |   |              | PEE ↓        | % Pos ↑      |
| MultiCM  | MB  | F | -            | 2.768        | 72.9%        | 0.852        | 68.0%        | 0.802        | 66.2%        | 0.744        | 59.8%        |
| PCA      | MB  | P | -            | 1.823        | 89.4%        | 1.467        | 92.1%        | 1.612        | 78.2%        | 1.821        | 84.7%        |
| ERAFT    | SL  | F | M            | 2.186        | 67.1%        | 0.899        | 72.7%        | 0.980        | 67.1%        | 1.100        | 57.9%        |
|          |     |   | D            | 0.908        | 86.3%        | 0.432        | 91.3%        | 0.541        | 90.9%        | 0.674        | 73.9%        |
| TCM      | SSL | F | M            | 2.445        | 82.2%        | 0.588        | 85.4%        | 0.556        | 87.7%        | 0.811        | 68.0%        |
|          |     |   | D            | 1.640        | 84.1%        | 0.523        | 85.5%        | 0.528        | 87.9%        | 0.871        | 68.1%        |
| PointNet | SL  | P | E            | 1.053        | 96.6%        | 0.765        | 96.1%        | 0.752        | 95.1%        | 1.185        | 91.5%        |
| Ours     | SL  | P | M            | 0.806        | 98.2%        | 0.470        | 96.6%        | 0.433        | 95.8%        | 0.392        | 94.3%        |
|          |     |   | D            | <b>0.567</b> | <b>99.4%</b> | 0.391        | <b>98.1%</b> | 0.298        | <b>97.1%</b> | 0.424        | 93.2%        |
|          |     |   | E            | 0.584        | 98.6%        | <b>0.286</b> | <b>98.1%</b> | <b>0.274</b> | 96.8%        | 0.354        | 95.5%        |
|          |     |   | M+D+E        | 0.568        | 98.5%        | 0.319        | 97.8%        | 0.300        | 97.0%        | <b>0.201</b> | <b>95.7%</b> |

Table 8. Per-scene normal flow evaluation on EVIMO2-imo split.



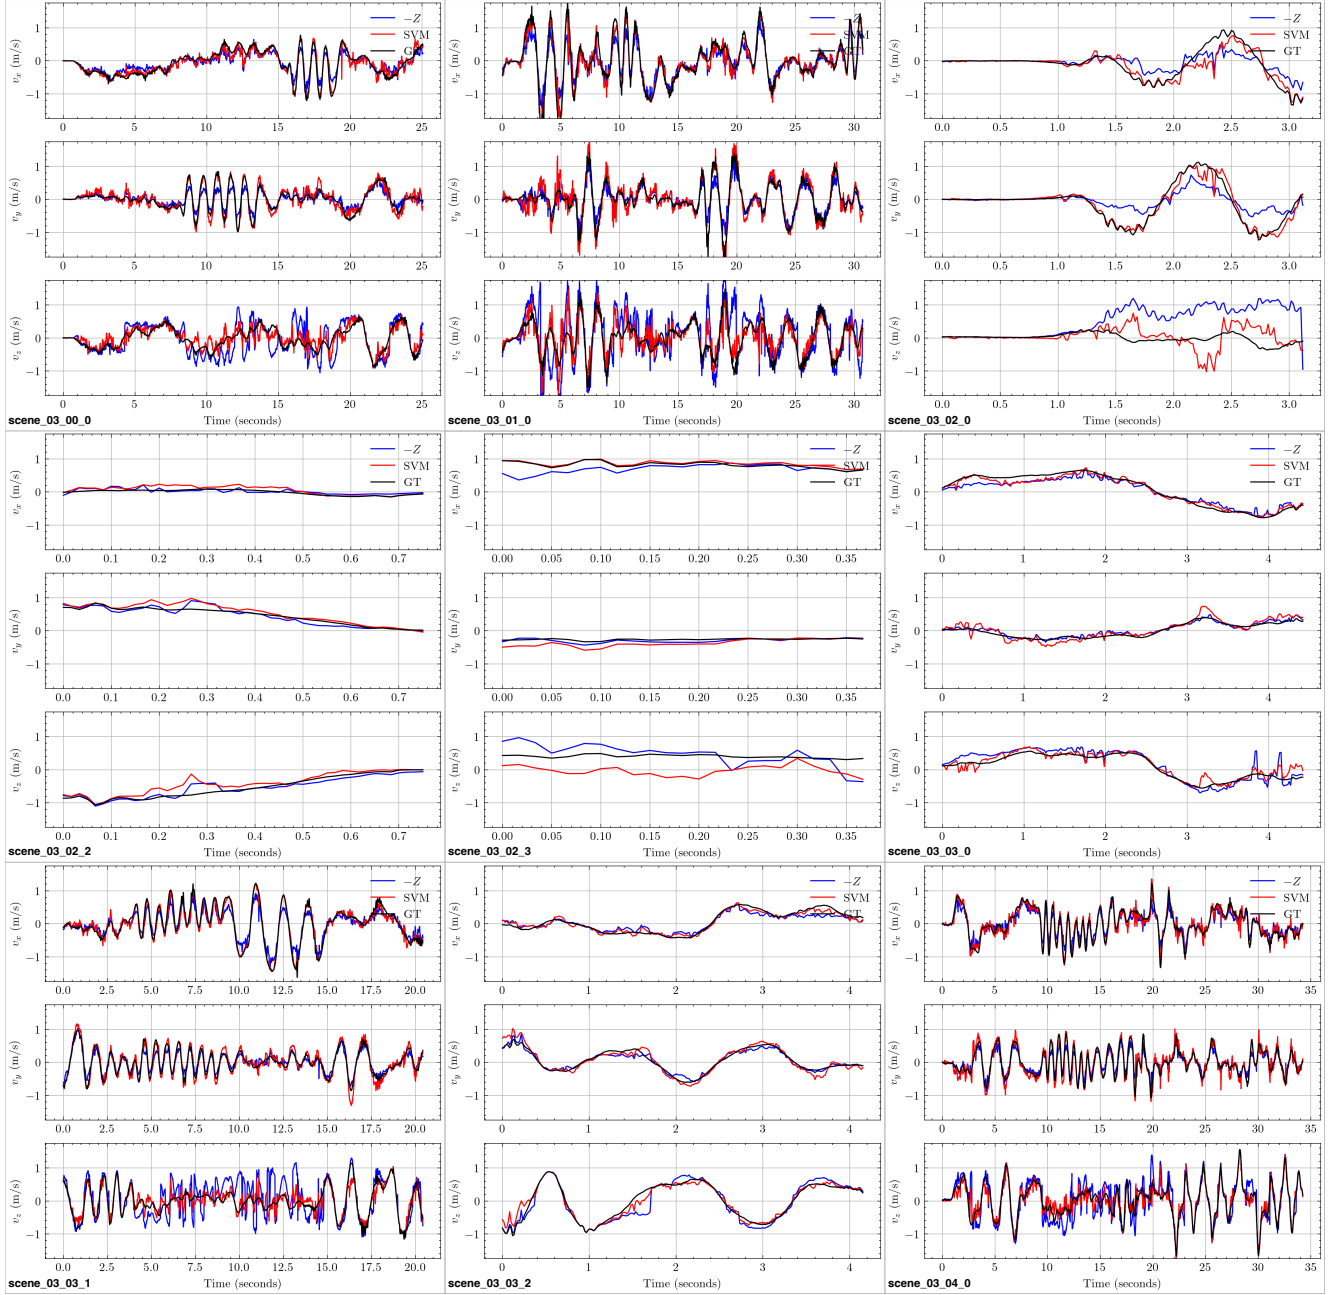

Figure 11. Per-scene egomotion evaluation on EVIMO2 sfm split.
